# Supplementary material for: Synthesis of neutral Li-endohedral PCBM: an n-dopant for fullerene derivatives
Source: Royal Society of Chemistry journal article supplement (doi:10.1039/d2cc03678a), 2022-01-01
Supplement: d2cc03678a1.pdf [file d2cc03678a1.pdf]

## Electronic Supplementary Information

### Synthesis of Li-Encapsulated PCBM: n-Dopant for Fullerene Derivatives

Hiroshi Ueno,<sup>a,b\*</sup> Daiki Kitabatake,<sup>a</sup> Hao-Sheng Lin,<sup>c</sup> Yue Ma,<sup>d</sup> Il Jeon,<sup>e</sup> Seiichiro Izawa,<sup>f,g</sup>  
Masahiro Hiramoto,<sup>f,g</sup> Fuminori Misaizu,<sup>b</sup> Shigeo Maruyama,<sup>h</sup> Yutaka Matsuo<sup>b,c,h\*</sup>

<sup>a</sup> Creative Interdisciplinary Research Division, Frontier Research Institute for Interdisciplinary Sciences (FRIS), Tohoku University, 6-3 Aoba, Aramaki, Aoba-ku, Sendai 980-8578, Japan;

<sup>b</sup> Department of Chemistry, Graduate School of Science, Tohoku University, 6-3 Aoba, Aramaki, Aoba-ku, Sendai 980-8578, Japan;

<sup>c</sup> Department of Chemical Systems Engineering, Graduate School of Engineering, Nagoya University, Furo-cho, Chikusa-ku, Nagoya 464-8603, Japan;

<sup>d</sup> Hefei National Laboratory for Physical Science at the Microscale, University of Science and Technology of China, Hefei, Anhui 230026, China;

<sup>e</sup> Department of Nano Engineering, SKKU Advanced Institute of Nano Technology (SAINT), Sungkyunkwan University (SKKU), Seobu-ro 2066, Jangan-gu, Suwon-si, Gyeonggi-do 16419, Republic of Korea;

<sup>f</sup> Division of Molecular Nanoscience, Research Center for Molecular Scale Nanoscience, Institute for Molecular Science, Okazaki, Aichi 444-8787, Japan;

<sup>g</sup> SOKENDAI (The Graduate University for Advanced Studies), Okazaki, Aichi 444-8787, Japan;

<sup>h</sup> Department of Mechanical Engineering, School of Engineering, The University of Tokyo, 7-3-1 Hongo, Bunkyo-ku, Tokyo 113-8656, Japan;

E-mail: [hiroshi.ueno.d5@tohoku.ac.jp](mailto:hiroshi.ueno.d5@tohoku.ac.jp) (HU), [yutaka.matsuo@chem.material.nagoya-u.ac.jp](mailto:yutaka.matsuo@chem.material.nagoya-u.ac.jp) (YM)

## General Procedure

Unless otherwise noted, all chemicals, including anhydrous solvents, were obtained from commercial suppliers and used as received without further purification. ITO substrates (15 × 15 mm with sheet resistance of 6  $\Omega$  sq.<sup>-1</sup>) were purchased from Techno Print Co., Ltd. The substrates were sequentially cleaned with detergent, distilled water, acetone, and 2-propanol in an ultrasonic bath for 15 min each, and were subjected to ultraviolet/ozone treatment for 15 min just before use. Li<sup>+</sup>@C<sub>60</sub> TFSI<sup>-</sup> and Li<sup>+</sup>@PCBM TFSI<sup>-</sup> were prepared according to reported procedures.<sup>S1</sup> ESR spectra were recorded on a JEOL JES-X330 system. The Fermi level was measured using a Kelvin probe (FAC-1, Riken-Keiki). DLS measurements were performed with a Malvern Zetasizer Nano ZS.

Ref S1: Y. Ma, H. Ueno, H. Okada, S. Manzhos and Y. Matsuo, *Org. Lett.* 2020, **22**, 7239–7243.

## Synthesis of neutral Li@PCBM

A DCM/MeCN (1/1, v/v) solution (2.0 mL) containing Fc\* (1.0 mg, 3.0  $\mu$ mol) was slowly added to a DCM/MeCN (1/1, v/v) solution (2.0 mL) containing Li<sup>+</sup>@PCBM TFSI<sup>-</sup> (3.6 mg, 3.0  $\mu$ mol). Stirring for 10 min afforded a greenish-black dispersion. The obtained solid was collected by filtration and washed with DCM/MeCN (1/1, v/v) 3 times using an ultrasonicator. After filtration, drying of the residue under vacuum at ambient temperature resulted in the isolation of Li@PCBM as a black powder (2.4 mg, 2.7  $\mu$ mol, 90%).

## Fermi level measurement

A PCBM solution (30 mg mL<sup>-1</sup>) and the same PCBM solution mixed with 0.5–5.0% of neutral Li@PCBM were spin-coated onto ITO substrates at 3000 rpm for 30 s. The Fermi levels of the films were measured using a Kelvin probe without exposure to air. The Kelvin probe was installed in a glovebox under a N<sub>2</sub> atmosphere (H<sub>2</sub>O <1 ppm, O<sub>2</sub> <1 ppm).

## Device fabrication and characterization

PEDOT:PSS (30  $\mu$ L) was spin-coated onto ITO substrates at 3000 rpm for 30 s, followed by annealing at 105 °C for 5 min. The perovskite precursor was prepared by mixing CH<sub>3</sub>NH<sub>3</sub>I, PbI<sub>2</sub>, and anhydrous dimethyl sulfoxide (molar ratio 1:1:1) in anhydrous *N,N*-dimethylformamide at a concentration of 50 wt %. The solution was filtered through a 0.45  $\mu$ m poly(tetrafluoroethylene) filter before use. The perovskite precursor solution (25  $\mu$ L) was spin-coated onto the PEDOT:PSS layer at 4000 rpm for 30 s, and 0.5 mL of anhydrous diethyl ether was slowly dropped onto the substrate 5 s after the start of the spin-coating process. This was followed by annealing at 65 °C for 1 min and then 100 °C for 5 min to obtain a dense brown MAPbI<sub>3</sub> film. For deposition of the electron transport layer, a PCBM solution (10 mg mL<sup>-1</sup>) and the same PCBM solution mixed with 1.0%, 2.0%, 3.0%, or 4.0% of Li@PCBM were spin-coated at 1000 rpm

for 30 s. Finally, a 5-nm-thick bathocuproine (BCP) layer and 70-nm-thick Ag electrode were fabricated by thermal deposition at a constant evaporation rate of  $0.05 \text{ nm s}^{-1}$  under a pressure of  $10^{-6}$  Torr. The  $J$ - $V$  characteristics were measured using a software-controlled source meter (2400 SourceMeter, Keithley) in the dark and under simulated sunlight irradiation of 1 sun (AM 1.5G;  $100 \text{ mW cm}^{-2}$ ) using a solar simulator (EMS-35AAA, Ushio Spax Inc.) with an Ushio Xe short arc lamp 500. The source meter was calibrated using a silicon diode (BS-520BK, Bunkokeiki)

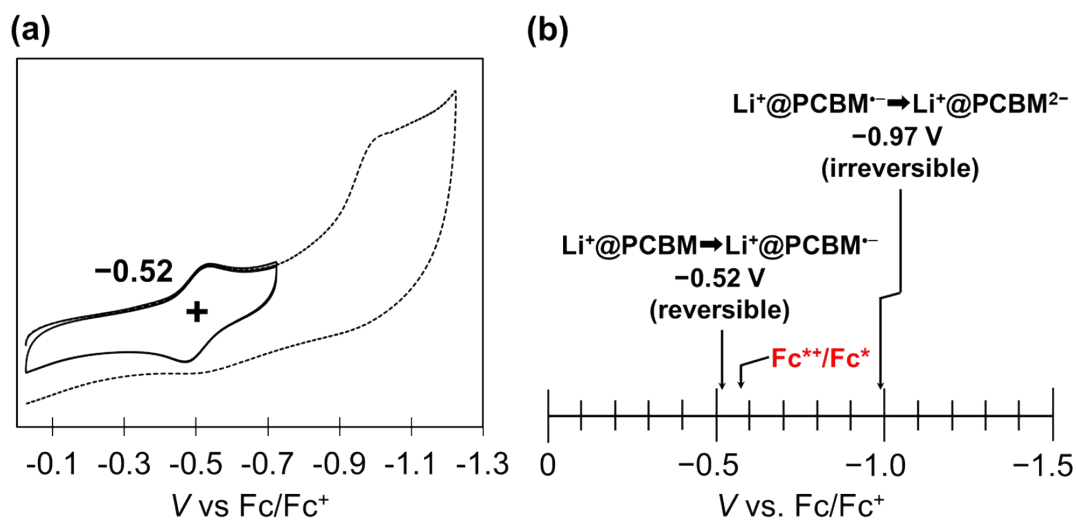

Fi

**g. S1.** (a) Cyclic voltammogram of  $\text{Li}^+\text{@PCBM TFSI}^-$  in  $\text{CH}_2\text{Cl}_2/\text{MeCN}$  (1/1, v/v) containing 0.1 M tetrabutylammonium TFSI $^-$ . (b) List of first and second reduction potentials of  $\text{Li}^+\text{@PCBM TFSI}^-$  along with the oxidation potential of  $\text{Fc}^*$ .

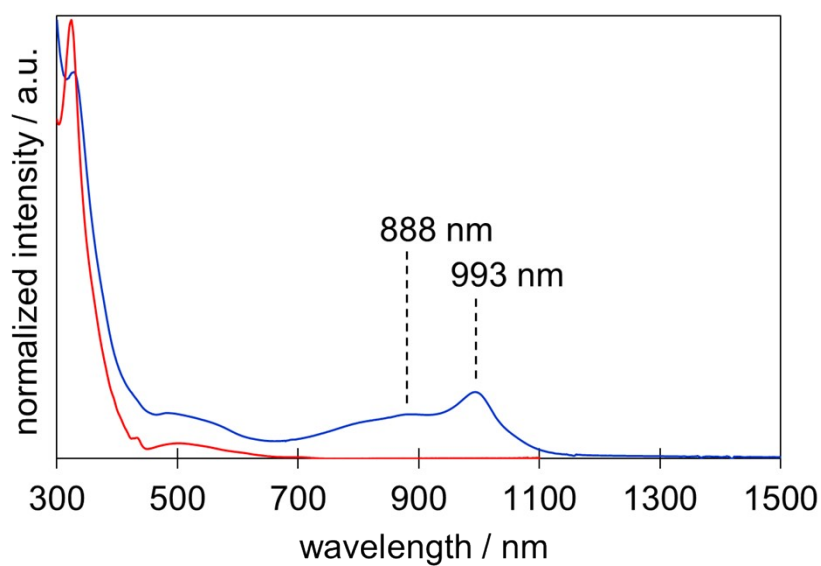

**Fig. S2.** UV-vis-NIR absorption spectrum of  $\text{Li@PCBM}$  measured in dichloromethane at room temperature (blue line). The spectrum of  $\text{Li}^+\text{@PCBM TFSI}^-$  is also shown as a reference (red line).

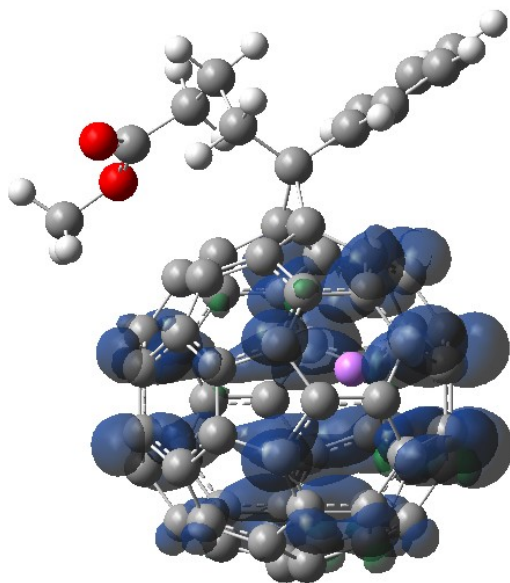

**Fig. S3.** Calculated spin density distribution of Li@PCBM in the optimized structure at (U)M062X/6-31G(d) level. Blue and green surfaces represent a and b spin density, respectively.

<sup>1</sup>H

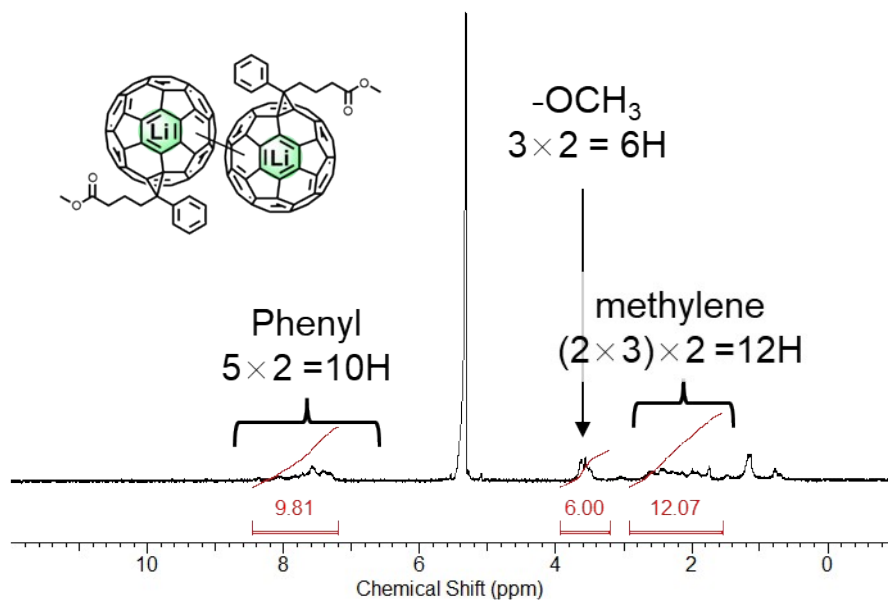

<sup>7</sup>Li

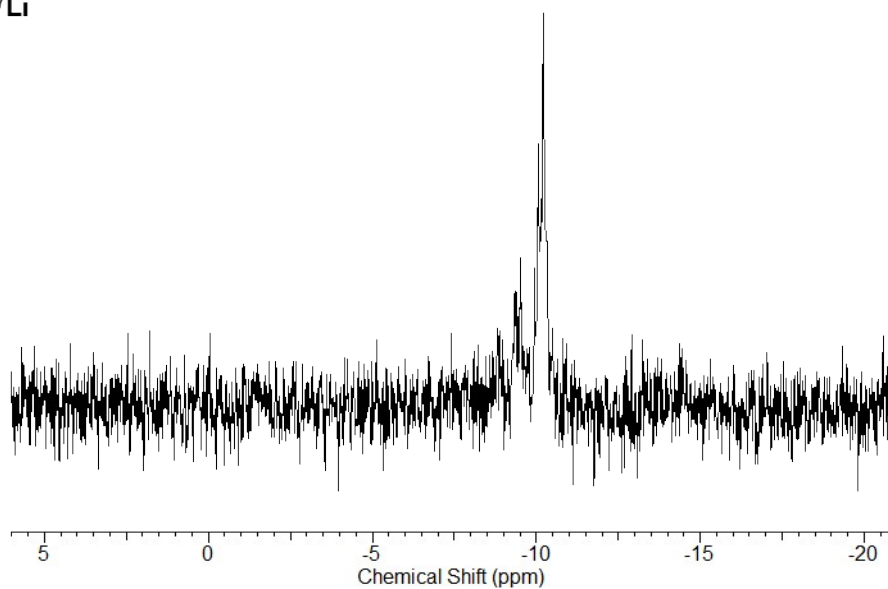

**Fig. S4.** <sup>1</sup>H and <sup>7</sup>Li NMR spectrum of Li@PCBM in CD<sub>2</sub>Cl<sub>2</sub> at 193 K. LiCl/D<sub>2</sub>O at ambient temperature was used as an external standard for <sup>7</sup>Li NMR measurement.

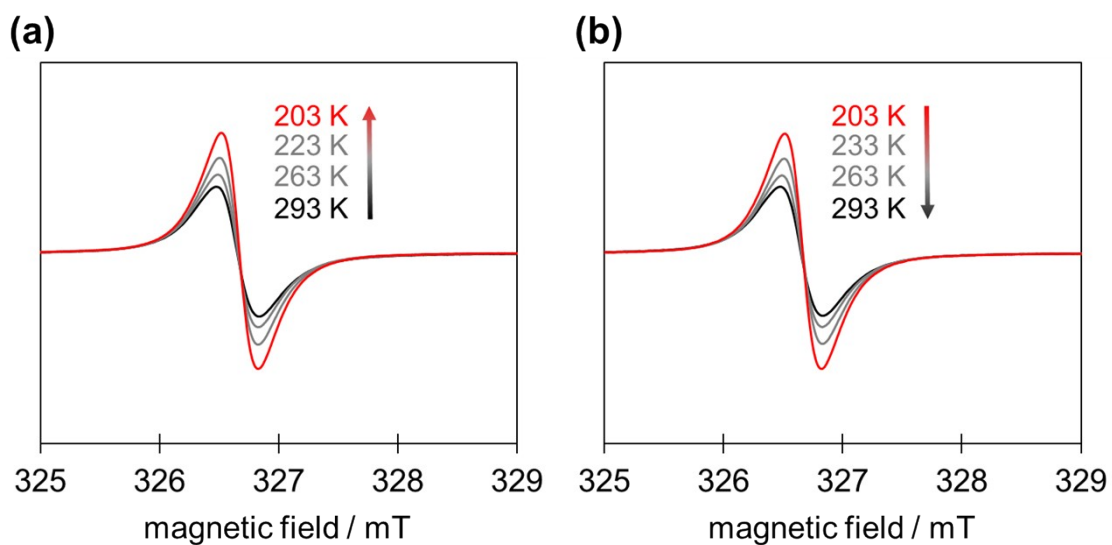

**Fig. S5.** VT-ESR spectra of Li@PCBM solid. (a) On cooling process and (b) heating process.

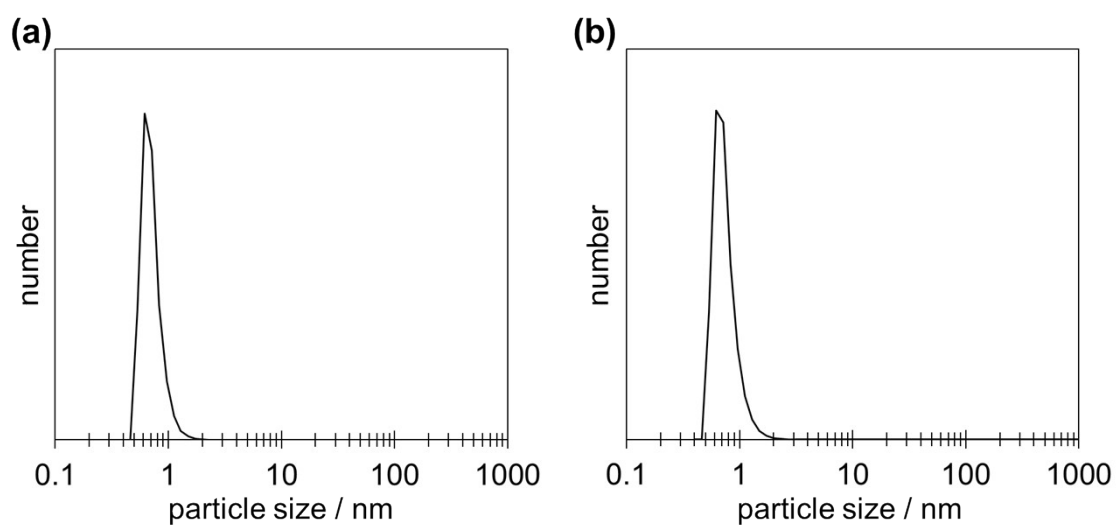

**Fig. S6.** Particle size distribution of (a) Li@PCBM (0.1 mg/mL) and (b) 0.1 mg/mL of empty PCBM with 1wt% Li@PCBM in chlorobenzene.

Table S1. Dopant-ratio dependence of the Fermi levels of Li@PCBM:PCBM binary film measured by Kelvin probe.

| Li@PCBM conc./wt% (mg/mL <sup>-1</sup> ) | Fermi level (eV) |
|------------------------------------------|------------------|
| 0 (0)                                    | -4.65 ± 0.1      |
| 0.5 (0.15)                               | -4.52 ± 0.1      |
| 1 (0.3)                                  | -4.52 ± 0.1      |
| 2 (0.6)                                  | -4.52 ± 0.1      |
| 3 (0.9)                                  | -4.52 ± 0.1      |
| 4 (1.2)                                  | -4.52 ± 0.1      |
| 5 (1.5)                                  | -4.52 ± 0.1      |



## Computational Results

Full geometry optimizations followed by frequency calculations have been carried out by using Gaussian 16 program at the M06-2X/6-31G(d) level. All frequency calculations showed no imaginary frequency. Full citation is as follows:

M. J. Frisch, G. W. Trucks, H. B. Schlegel, G. E. Scuseria, M. A. Robb, J. R. Cheeseman, G. Scalmani, V. Barone, G. A. Petersson, H. Nakatsuji, X. Li, M. Caricato, A. V. Marenich, J. Bloino, B. G. Janesko, R. Gomperts, B. Mennucci, H. P. Hratchian, J. V. Ortiz, A. F. Izmaylov, J. L. Sonnenberg, D. Williams-Young, F. Ding, F. Lipparini, F. Egidi, J. Goings, B. Peng, A. Petrone, T. Henderson, D. Ranasinghe, V. G. Zakrzewski, J. Gao, N. Rega, G. Zheng, W. Liang, M. Hada, M. Ehara, K. Toyota, R. Fukuda, J. Hasegawa, M. Ishida, T. Nakajima, Y. Honda, O. Kitao, H. Nakai, T. Vreven, K. Throssell, J. A. Montgomery, Jr., J. E. Peralta, F. Ogliaro, M. J. Bearpark, J. J. Heyd, E. N. Brothers, K. N. Kudin, V. N. Staroverov, T. A. Keith, R. Kobayashi, J. Normand, K. Raghavachari, A. P. Rendell, J. C. Burant, S. S. Iyengar, J. Tomasi, M. Cossi, J. M. Millam, M. Klene, C. Adamo, R. Cammi, J. W. Ochterski, R. L. Martin, K. Morokuma, O. Farkas, J. B. Foresman, and D. J. Fox, *Gaussian 16, Revision C.01*, Gaussian, Inc., Wallingford CT, 2016.

## Geometrical coordinates

Li<sup>+</sup>@PCBM<sup>-</sup> by (U)M06-2x/6-31G(d)

$E = -2908.921927$  au

|   |          |          |          |   |          |           |          |
|---|----------|----------|----------|---|----------|-----------|----------|
| O | 2.172159 | 7.214977 | 5.132162 | C | 8.307187 | 3.796185  | 4.983177 |
| O | 0.863123 | 5.595762 | 5.974024 | C | 7.999014 | 4.447108  | 6.224595 |
| C | 3.629933 | 3.348821 | 4.039488 | C | 6.733351 | 5.001181  | 6.418018 |
| C | 5.051537 | 3.580375 | 3.352668 | C | 6.062696 | 4.838576  | 7.688276 |
| C | 6.047473 | 4.343647 | 4.160500 | C | 4.651952 | 4.662113  | 7.432135 |
| C | 5.743658 | 4.946354 | 5.362553 | C | 3.905683 | 3.782475  | 8.217421 |
| C | 4.429995 | 4.730270 | 6.001560 | C | 2.932306 | 2.926617  | 7.599168 |
| C | 3.480961 | 3.924297 | 5.410127 | C | 2.973282 | 1.635816  | 8.278909 |
| C | 2.747041 | 2.980940 | 6.219219 | C | 2.808550 | 0.463695  | 7.554202 |
| C | 2.571316 | 1.762351 | 5.459756 | C | 2.596523 | 0.517837  | 6.119187 |
| C | 3.202399 | 1.926570 | 4.188026 | C | 3.301331 | -0.579129 | 5.527836 |
| C | 3.893858 | 0.864816 | 3.605945 | C | 3.943640 | -0.423919 | 4.287038 |
| C | 5.197559 | 1.076954 | 2.970294 | C | 5.245416 | -1.021264 | 4.063025 |
| C | 5.776653 | 2.345485 | 2.933074 | C | 6.023727 | -0.085957 | 3.273786 |
| C | 7.166936 | 2.506577 | 3.222833 | C | 7.394405 | 0.084142  | 3.534349 |
| C | 7.339316 | 3.725721 | 3.983587 | C | 7.979206 | 1.390311  | 3.498481 |

|   |          |           |          |    |          |           |           |
|---|----------|-----------|----------|----|----------|-----------|-----------|
| C | 8.976476 | 1.462933  | 4.551244 | C  | 8.124800 | -0.135530 | 8.669739  |
| C | 9.138917 | 2.634185  | 5.277181 | C  | 3.776367 | 4.105897  | 2.744967  |
| C | 9.353241 | 2.584075  | 6.706041 | C  | 3.319214 | 3.435339  | 1.477026  |
| C | 8.638110 | 3.697057  | 7.294682 | C  | 4.143370 | 3.484943  | 0.350070  |
| C | 7.988664 | 3.544007  | 8.513360 | C  | 3.722252 | 2.938725  | -0.857554 |
| C | 6.679775 | 4.126530  | 8.719658 | C  | 2.469577 | 2.335746  | -0.950238 |
| C | 5.906849 | 3.206542  | 9.526203 | C  | 1.642905 | 2.282090  | 0.168191  |
| C | 4.549132 | 3.034060  | 9.285215 | C  | 2.066221 | 2.829712  | 1.376922  |
| C | 3.962915 | 1.711063  | 9.330010 | C  | 3.573090 | 5.619794  | 2.757493  |
| C | 4.763345 | 0.599513  | 9.612619 | C  | 2.121150 | 6.055116  | 2.538217  |
| C | 4.595372 | -0.620632 | 8.862108 | C  | 1.162129 | 5.602043  | 3.636311  |
| C | 3.634419 | -0.693842 | 7.849135 | C  | 1.474658 | 6.243001  | 4.970798  |
| C | 3.944361 | -1.339945 | 6.597126 | C  | 1.141975 | 6.104219  | 7.278382  |
| C | 5.207355 | -1.894941 | 6.384373 | Li | 5.529293 | 0.791672  | 5.262620  |
| C | 5.873602 | -1.746533 | 5.111610 | H  | 5.124326 | 3.948544  | 0.428593  |
| C | 7.281624 | -1.558989 | 5.374373 | H  | 4.373595 | 2.979306  | -1.724882 |
| C | 8.038938 | -0.676587 | 4.602963 | H  | 2.140947 | 1.905567  | -1.890999 |
| C | 9.019570 | 0.178351  | 5.227023 | H  | 0.667465 | 1.810418  | 0.103526  |
| C | 9.221446 | 0.128530  | 6.609446 | H  | 1.422500 | 2.775884  | 2.251385  |
| C | 9.389185 | 1.348964  | 7.360371 | H  | 4.195235 | 6.034705  | 1.955317  |
| C | 8.711708 | 1.192485  | 8.632453 | H  | 3.939535 | 6.046441  | 3.695681  |
| C | 8.028837 | 2.262027  | 9.196969 | H  | 2.101699 | 7.148165  | 2.491984  |
| C | 6.739003 | 2.053063  | 9.824924 | H  | 1.762706 | 5.679794  | 1.573980  |
| C | 6.179356 | 0.782487  | 9.865055 | H  | 0.131517 | 5.876606  | 3.380004  |
| C | 6.890848 | -0.335514 | 9.270616 | H  | 1.158971 | 4.515230  | 3.774015  |
| C | 5.907182 | -1.200692 | 8.643136 | H  | 0.748921 | 7.117958  | 7.384326  |
| C | 6.206913 | -1.828194 | 7.440772 | H  | 2.220876 | 6.121038  | 7.452085  |
| C | 7.496069 | -1.619369 | 6.813082 | H  | 0.651904 | 5.424028  | 7.973282  |
| C | 8.436774 | -0.791122 | 7.411609 |    |          |           |           |

Li<sup>+</sup>@PCBM cation by M06-2x/6-31G(d)

*E* = -2908.727905 au

|   |          |          |          |   |          |          |          |
|---|----------|----------|----------|---|----------|----------|----------|
| O | 2.306984 | 7.083232 | 5.187626 | C | 6.084479 | 4.309278 | 4.146374 |
| O | 0.823068 | 5.568142 | 5.925861 | C | 5.785746 | 4.908040 | 5.359150 |
| C | 3.609405 | 3.348611 | 4.036303 | C | 4.470309 | 4.708260 | 6.003793 |
| C | 5.079928 | 3.566558 | 3.322708 | C | 3.494667 | 3.920577 | 5.416508 |

|   |          |           |          |    |          |           |           |
|---|----------|-----------|----------|----|----------|-----------|-----------|
| C | 2.758727 | 2.986572  | 6.241138 | C  | 3.909006 | -1.342614 | 6.609701  |
| C | 2.571468 | 1.760089  | 5.489202 | C  | 5.158658 | -1.907664 | 6.403332  |
| C | 3.188709 | 1.920265  | 4.191094 | C  | 5.827677 | -1.744209 | 5.123966  |
| C | 3.880208 | 0.856496  | 3.636315 | C  | 7.250500 | -1.596933 | 5.376997  |
| C | 5.195698 | 1.052613  | 2.988912 | C  | 8.006941 | -0.733106 | 4.599168  |
| C | 5.779252 | 2.306877  | 2.919830 | C  | 9.005456 | 0.117176  | 5.222907  |
| C | 7.185946 | 2.446358  | 3.226255 | C  | 9.197812 | 0.067362  | 6.596524  |
| C | 7.373299 | 3.673011  | 3.978359 | C  | 9.385150 | 1.294795  | 7.350508  |
| C | 8.339695 | 3.731350  | 4.976365 | C  | 8.711652 | 1.143878  | 8.626581  |
| C | 8.039983 | 4.395863  | 6.221051 | C  | 8.050410 | 2.223902  | 9.194157  |
| C | 6.782609 | 4.959580  | 6.410622 | C  | 6.757624 | 2.031644  | 9.828222  |
| C | 6.111559 | 4.807130  | 7.687663 | C  | 6.184444 | 0.768218  | 9.865934  |
| C | 4.692694 | 4.646237  | 7.435561 | C  | 6.875494 | -0.360266 | 9.269014  |
| C | 3.943214 | 3.784661  | 8.230021 | C  | 5.881645 | -1.216428 | 8.647219  |
| C | 2.954020 | 2.931214  | 7.616779 | C  | 6.165321 | -1.848858 | 7.444790  |
| C | 2.970769 | 1.649803  | 8.301889 | C  | 7.457997 | -1.656534 | 6.810621  |
| C | 2.791652 | 0.477679  | 7.583281 | C  | 8.408691 | -0.840686 | 7.407667  |
| C | 2.590104 | 0.534035  | 6.145896 | C  | 8.109517 | -0.176572 | 8.663472  |
| C | 3.274922 | -0.584676 | 5.546275 | C  | 3.795325 | 4.099345  | 2.745271  |
| C | 3.917936 | -0.419658 | 4.323310 | C  | 3.326698 | 3.430949  | 1.478051  |
| C | 5.222044 | -1.017973 | 4.109122 | C  | 4.146145 | 3.487808  | 0.348074  |
| C | 6.008216 | -0.108643 | 3.296644 | C  | 3.715144 | 2.950609  | -0.859975 |
| C | 7.372497 | 0.024796  | 3.535799 | C  | 2.459462 | 2.352573  | -0.947598 |
| C | 7.974160 | 1.335086  | 3.505005 | C  | 1.637835 | 2.295355  | 0.174403  |
| C | 8.986520 | 1.399250  | 4.544800 | C  | 2.069863 | 2.833231  | 1.384616  |
| C | 9.164729 | 2.570791  | 5.264361 | C  | 3.621511 | 5.618705  | 2.760122  |
| C | 9.371990 | 2.520382  | 6.699124 | C  | 2.181121 | 6.084014  | 2.527707  |
| C | 8.676290 | 3.649060  | 7.291196 | C  | 1.191857 | 5.634801  | 3.599829  |
| C | 8.029059 | 3.501254  | 8.508947 | C  | 1.519701 | 6.195223  | 4.965974  |
| C | 6.719411 | 4.096510  | 8.712187 | C  | 1.046955 | 6.053125  | 7.251540  |
| C | 5.937007 | 3.189786  | 9.534348 | Li | 5.265497 | 2.330792  | 5.216745  |
| C | 4.578001 | 3.038796  | 9.300851 | H  | 5.125787 | 3.956453  | 0.417064  |
| C | 3.976881 | 1.717999  | 9.344724 | H  | 4.358548 | 2.998749  | -1.732313 |
| C | 4.764127 | 0.607615  | 9.616882 | H  | 2.122421 | 1.932717  | -1.889577 |
| C | 4.576842 | -0.619953 | 8.863307 | H  | 0.658332 | 1.832990  | 0.110371  |
| C | 3.610256 | -0.685014 | 7.869406 | H  | 1.423630 | 2.783080  | 2.257606  |

|   |          |          |          |   |          |          |          |
|---|----------|----------|----------|---|----------|----------|----------|
| H | 4.258450 | 6.014565 | 1.960680 | H | 1.125677 | 4.544021 | 3.686693 |
| H | 3.986973 | 6.042129 | 3.699943 | H | 0.737973 | 7.097141 | 7.331452 |
| H | 2.190454 | 7.177437 | 2.498935 | H | 2.107794 | 5.979844 | 7.506980 |
| H | 1.831055 | 5.735617 | 1.550929 | H | 0.446510 | 5.422129 | 7.904503 |
| H | 0.179581 | 5.971213 | 3.346378 |   |          |          |          |

Empty PCBM by M06-2x/6-31G(d)

$E = -2901.380081$  au

|   |          |           |          |   |          |           |          |
|---|----------|-----------|----------|---|----------|-----------|----------|
| O | 2.198910 | 7.197585  | 5.139641 | C | 5.234743 | -1.016062 | 4.104773 |
| O | 0.871074 | 5.580565  | 5.955445 | C | 6.017333 | -0.103684 | 3.292349 |
| C | 3.640896 | 3.326347  | 4.040661 | C | 7.380787 | 0.034896  | 3.533559 |
| C | 5.063622 | 3.545234  | 3.353443 | C | 7.973870 | 1.347528  | 3.505287 |
| C | 6.064403 | 4.300129  | 4.160845 | C | 8.981323 | 1.418021  | 4.548829 |
| C | 5.765856 | 4.913291  | 5.359174 | C | 9.152394 | 2.590007  | 5.269052 |
| C | 4.451677 | 4.708556  | 5.998944 | C | 9.355715 | 2.538488  | 6.703919 |
| C | 3.499185 | 3.903985  | 5.410220 | C | 8.654149 | 3.664347  | 7.294367 |
| C | 2.761111 | 2.972179  | 6.226390 | C | 8.007232 | 3.514254  | 8.512395 |
| C | 2.582143 | 1.746812  | 5.474314 | C | 6.695159 | 4.103378  | 8.713157 |
| C | 3.209053 | 1.906417  | 4.187520 | C | 5.914455 | 3.192651  | 9.531467 |
| C | 3.886618 | 0.846289  | 3.625287 | C | 4.557085 | 3.034834  | 9.291086 |
| C | 5.199778 | 1.048638  | 2.983186 | C | 3.962820 | 1.710837  | 9.331871 |
| C | 5.772662 | 2.301488  | 2.936973 | C | 4.753160 | 0.603547  | 9.609629 |
| C | 7.173668 | 2.451690  | 3.236549 | C | 4.573830 | -0.624145 | 8.855573 |
| C | 7.353175 | 3.677494  | 3.988647 | C | 3.612113 | -0.690801 | 7.856490 |
| C | 8.324218 | 3.747496  | 4.980174 | C | 3.916292 | -1.347546 | 6.597564 |
| C | 8.020330 | 4.410308  | 6.223226 | C | 5.168405 | -1.909388 | 6.395561 |
| C | 6.758899 | 4.966378  | 6.409271 | C | 5.840253 | -1.743870 | 5.118517 |
| C | 6.086239 | 4.807354  | 7.684473 | C | 7.260978 | -1.588630 | 5.375422 |
| C | 4.668676 | 4.643333  | 7.428555 | C | 8.013327 | -0.718341 | 4.600300 |
| C | 3.920269 | 3.779089  | 8.221381 | C | 9.005132 | 0.136913  | 5.227900 |
| C | 2.938885 | 2.921829  | 7.603753 | C | 9.197697 | 0.085611  | 6.601865 |
| C | 2.959857 | 1.639818  | 8.286687 | C | 9.376999 | 1.313124  | 7.356335 |
| C | 2.788769 | 0.467312  | 7.566963 | C | 8.701010 | 1.158989  | 8.630246 |
| C | 2.590153 | 0.520783  | 6.129492 | C | 8.032285 | 2.236207  | 9.195386 |
| C | 3.279441 | -0.594837 | 5.533043 | C | 6.738647 | 2.037639  | 9.825866 |
| C | 3.926349 | -0.425019 | 4.312640 | C | 6.171581 | 0.770963  | 9.862770 |

|   |          |           |           |   |          |          |           |
|---|----------|-----------|-----------|---|----------|----------|-----------|
| C | 6.869598 | -0.353783 | 9.267341  | C | 1.495971 | 6.232315 | 4.962756  |
| C | 5.881537 | -1.214405 | 8.642931  | C | 1.144985 | 6.074353 | 7.265950  |
| C | 6.171147 | -1.843776 | 7.439820  | H | 5.132089 | 3.940023 | 0.426908  |
| C | 7.464691 | -1.645314 | 6.809311  | H | 4.367331 | 2.998342 | -1.733677 |
| C | 8.410846 | -0.826259 | 7.410140  | H | 2.128032 | 1.938371 | -1.901848 |
| C | 8.104779 | -0.163990 | 8.665019  | H | 0.663417 | 1.828869 | 0.098492  |
| C | 3.793895 | 4.086486  | 2.748434  | H | 1.433690 | 2.765997 | 2.253104  |
| C | 3.328890 | 3.426766  | 1.477624  | H | 4.240605 | 6.013360 | 1.967684  |
| C | 4.148336 | 3.482696  | 0.347615  | H | 3.972202 | 6.022167 | 3.705779  |
| C | 3.719394 | 2.951941  | -0.864034 | H | 2.155883 | 7.150146 | 2.495805  |
| C | 2.463137 | 2.356567  | -0.957918 | H | 1.808972 | 5.691547 | 1.564889  |
| C | 1.641501 | 2.295081  | 0.163697  | H | 0.163836 | 5.893647 | 3.357145  |
| C | 2.073187 | 2.827424  | 1.376351  | H | 1.174116 | 4.518433 | 3.748916  |
| C | 3.607749 | 5.602450  | 2.763646  | H | 0.763052 | 7.091688 | 7.378101  |
| C | 2.163129 | 6.056606  | 2.534634  | H | 2.222687 | 6.077416 | 7.448330  |
| C | 1.189166 | 5.606005  | 3.620403  | H | 0.641467 | 5.394109 | 7.951246  |
